# Supplementary material for: Frequent new particle formation at remote sites in the subboreal forest of North America
Source: Copernicus journal article supplement (doi:10.5194/acp-22-2487-2022), 2022-02-24
Supplement: Supplementary file 1 [file acp-22-2487-2022-supplement.zip]

Archive with 5 entries (5 files):
- Supplement_NazkoRiver_Trajectories_daily.pdf
- acp-22-2487-2022-supplement-title-page.pdf
- Supplement_EagleLake_Trajectories_daily.pdf
- Supplementary_Table_S1.pdf
- Supplemental_Figs_S1-S4.pdf
