# Supplementary material for: Frequent new particle formation at remote sites in the subboreal forest of North America
Source: Copernicus journal article supplement (doi:10.5194/acp-22-2487-2022), 2022-02-24
Supplement: Supplementary file 1 [file acp-22-2487-2022-supplement.zip › acp-22-2487-2022-supplement-title-page.pdf]

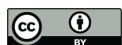

*Supplement of*

## **Frequent new particle formation at remote sites in the subboreal forest of North America**

**Meinrat O. Andreae et al.**

*Correspondence to:* Meinrat O. Andreae (m.andreae@mpic.de)

- acp-22-2487-2022-supplement-title-page.pdf
- Supplement\_EagleLake\_Trajectories\_daily.pdf
- Supplement\_NazkoRiver\_Trajectories\_daily.pdf
- Supplemental\_Figs\_S1-S4.pdf
- Supplementary\_Table\_S1.pdf

The copyright of individual parts of the supplement might differ from the article licence.
