# Supplementary material for: Frequent new particle formation at remote sites in the subboreal forest of North America
Source: Copernicus journal article supplement (doi:10.5194/acp-22-2487-2022), 2022-02-24
Supplement: Supplementary file 1 [file acp-22-2487-2022-supplement.zip › Supplemental_Figs_S1-S4.pdf]

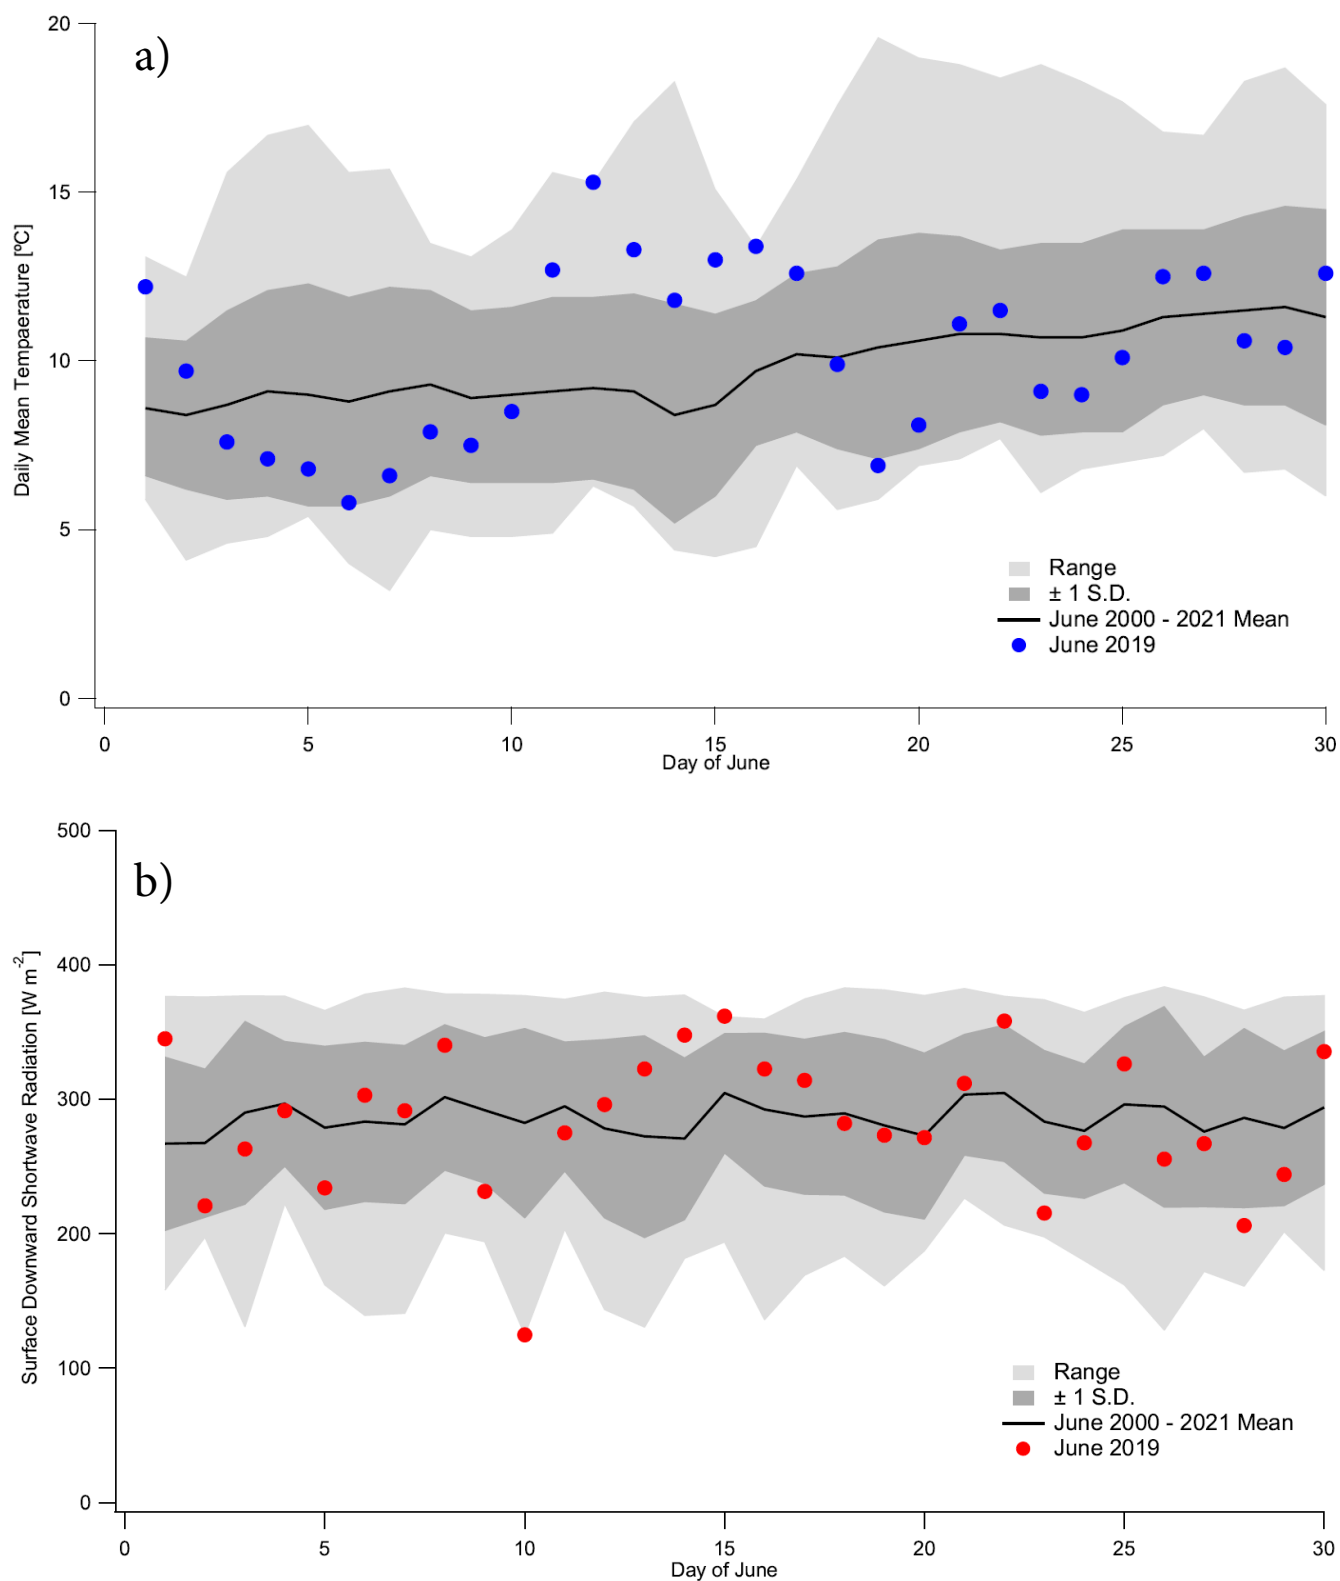

**Figure S1: Comparison of meteorological data during June 2019 with the long term averages from the years 2000 - 2021 for a) temperature and b) surface downward shortwave radiation. The markers represent the June 2019 data, the black lines the means 2000 - 2021, the dark gray shading shows  $\pm 1$  standard deviation around the mean and the light gray shading the range of daily values.**

☆ Eagle Lake Site, 100 m, 10-day backtrajectories

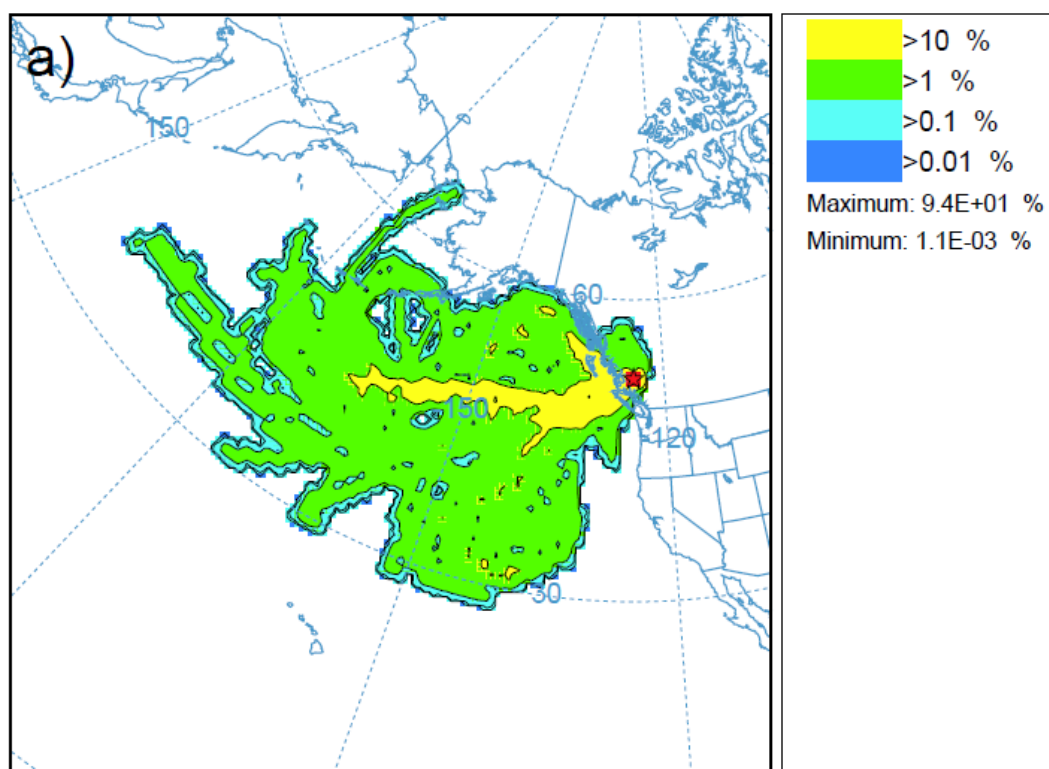

☆ Nazko River Site, 100 m, 10-day backtrajectories

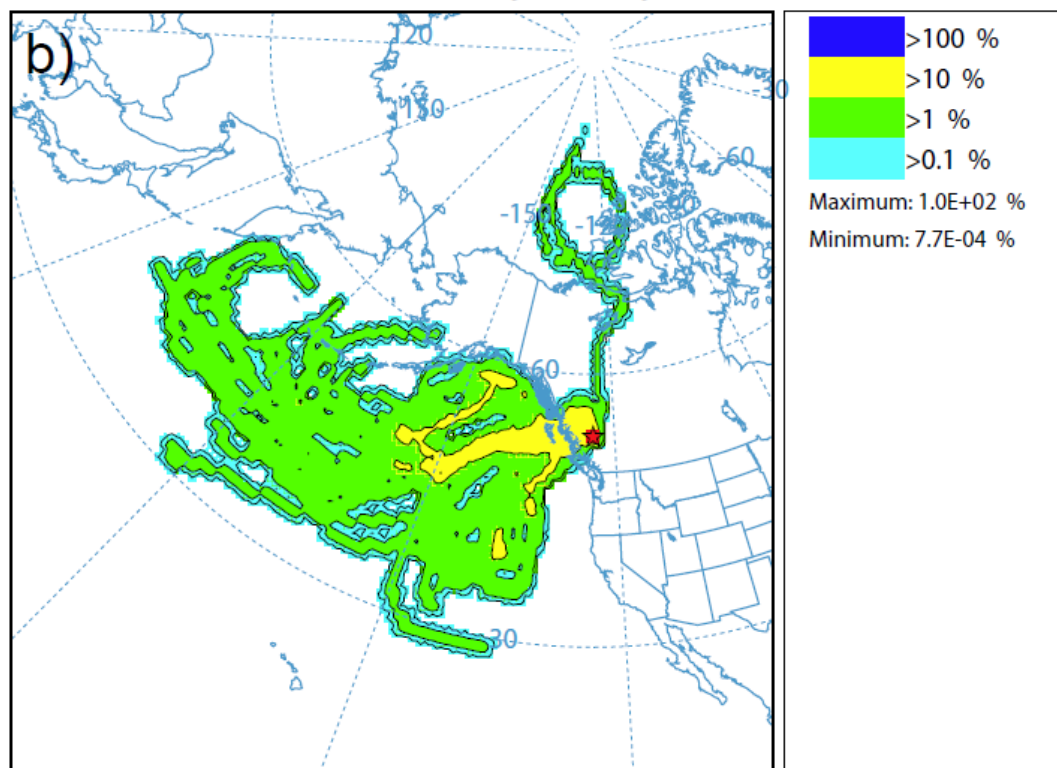

Fig. S2: Trajectory frequency statistics for 10-day backtrajectories initialized at 1900 UTC at 100 m above ground level on each of the sampling days at a) Eagle Lake and b) Nazko River.

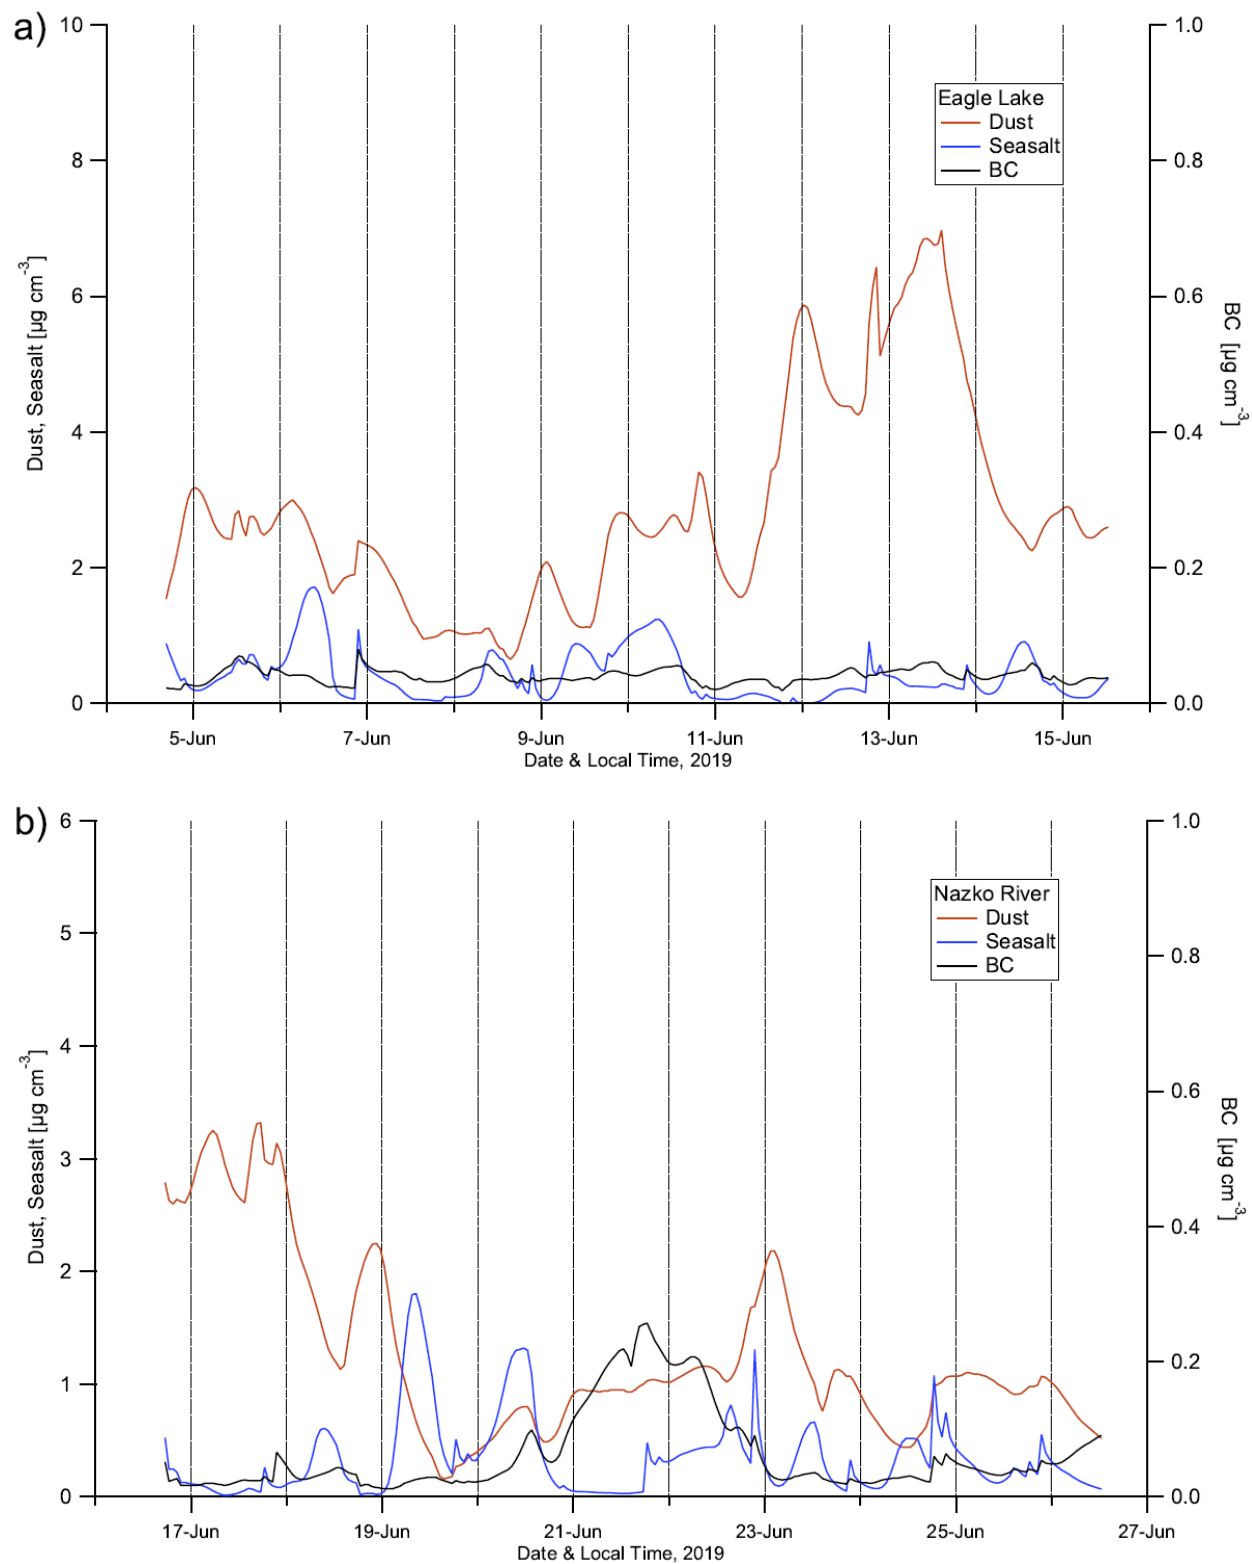

**Fig. S3: Concentrations of dust, seasalt, and black carbon (BC) aerosols in the study area from the MERRA-2 data base during the sampling periods at a) Eagle Lake and b) Nazko River.**

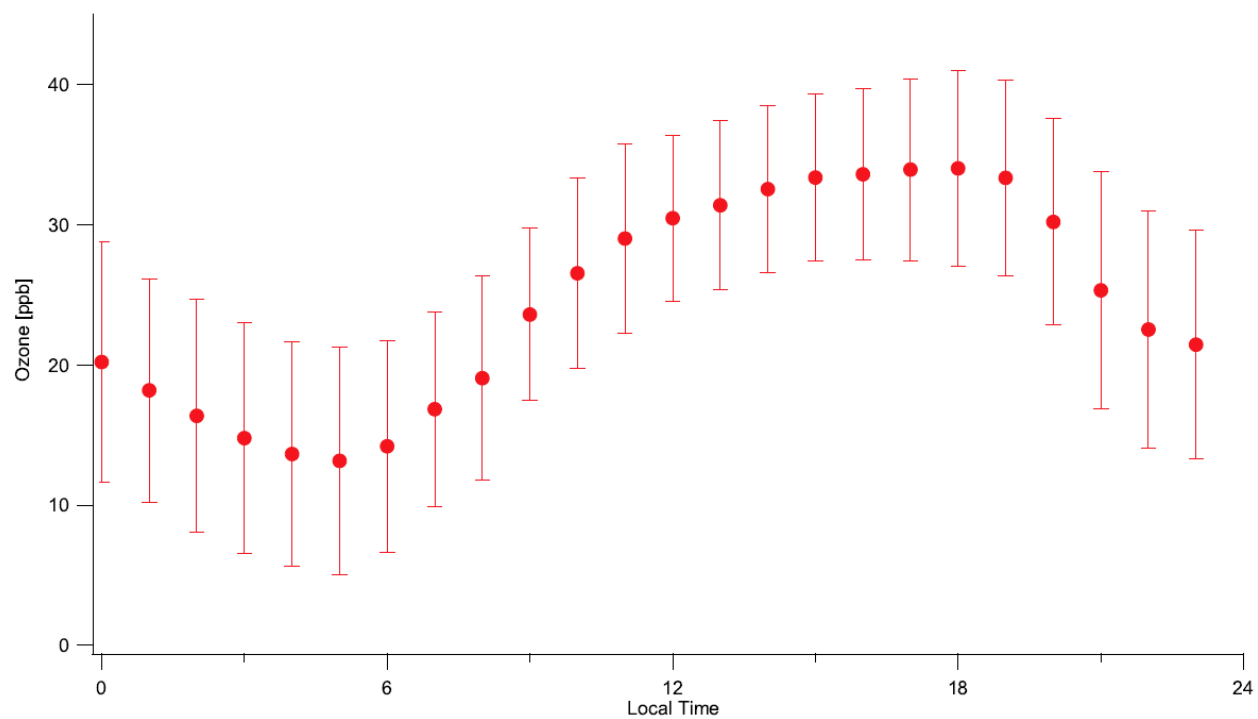

**Fig. S4: Ozone concentrations during June 2019 at Williams Lake, BC (averages and standard distributions).**
