# Supplementary material for: Frequent new particle formation at remote sites in the subboreal forest of North America
Source: Copernicus journal article supplement (doi:10.5194/acp-22-2487-2022), 2022-02-24
Supplement: Supplementary file 1 [file acp-22-2487-2022-supplement.zip › Supplementary_Table_S1.pdf]

Supplement Table S1: Comparison of meteorological parameters during June 2019 with average values during the same month in the years 2000 to 2021. The data represent monthly averages for a box bounded by 128.75 °W, 51 °N, 123.125 °W, 53 °N, and were obtained from the MERRA-2 reanalysis and MODIS databases.

| Parameter                          | Units              | Average±<br>Standard<br>Deviation | June 2019 | Ratio<br>June 2019/<br>Average | Source  |
|------------------------------------|--------------------|-----------------------------------|-----------|--------------------------------|---------|
| Temperature                        | °C                 | 9.8±1.2                           | 10.2      | 1.04                           | MERRA-2 |
| Shortwave<br>downward<br>radiation | W m <sup>-2</sup>  | 222±17                            | 249       | 1.12                           | MERRA-2 |
| Precipitation                      | mm d <sup>-1</sup> | 4.5±1.2                           | 4.4       | 0.97                           | MERRA-2 |
| Specific<br>Humidity               | g kg <sup>-1</sup> | 6.3±0.4                           | 6.5       | 1.02                           | MERRA-2 |
| Cloud<br>Fraction                  | %                  | 77.6%±7.6%                        | 80.9%     | 1.04                           | MODIS   |
